# Supplementary material
Source: PubMed Central journal article supplement (PMC3187126)
Supplement: supp_77_18_6451__1.pdf [file supp_77_18_6451__1.pdf]

Fallico et al. Plasmids of raw milk cheese isolate *L. lactis* subsp. *lactis* biovar. *diacetylactis* DPC3901 suggest a plant-based origin for the strain. Supplementary file\_Tables S1-S4

TABLE S1. List of ORFs identified in pVF50 (size 53,876 bps; GC content 34.5%)

| Gene name | Start (bp) | End (bp) | Strand | Length (aa) | G+C (%) | Product / Predicted function / Conserved domain(s)                                                                                                                                                                    | Highest homology protein                         | aa identity (%) | E-value | Organism, plasmid                                    |
|-----------|------------|----------|--------|-------------|---------|-----------------------------------------------------------------------------------------------------------------------------------------------------------------------------------------------------------------------|--------------------------------------------------|-----------------|---------|------------------------------------------------------|
| orf1      | 518        | 1243     | +      | 241         | 30.71   | Putative phage transcriptional repressor; Peptidase S24_S26_LexA-like superfamily (cd06462)                                                                                                                           | putative transcriptional regulator               | 73/192 (38%)    | 7e-30   | <i>Streptococcus thermophilus</i>                    |
| repA      | 1748       | 3100     | +      | 450         | 31.18   | Initiator Replication protein (pfam01051)                                                                                                                                                                             | replication protein                              | 448/450 (99%)   | 0.0     | <i>Lactococcus lactis</i> , pGdh442                  |
| parA      | 3853       | 4611     | +      | 252         | 28.83   | ParA domain (cd02042); Soj domain, ATPases involved in chromosome partitioning (COG1192)                                                                                                                              | partition protein A                              | 250/252 (99%)   | 1e-178  | <i>Lactococcus lactis</i> , pGdh442                  |
| parB      | 4616       | 5344     | +      | 242         | 33.88   | ParB-like nuclease domain (pfam02195)                                                                                                                                                                                 | partition protein B                              | 241/242 (99%)   | 3e-173  | <i>Lactococcus lactis</i> , pGdh442                  |
| tnp-IS110 | 6092       | 7348     | +      | 418         | 38.03   | Transposase belonging to the IS110 family; Transposase_20 domain (pfam02371); Transposase_9 domain (pfam01548)                                                                                                        | transposase, IS116/IS110/IS902 family protein    | 314/419 (75%)   | 0.0     | <i>Streptococcus pneumoniae</i> SP19-BS75            |
| orf6      | 7514       | 7849     | +      | 111         | 34.82   | Transposase and inactivated derivatives, Tra5 (COG2801); truncated, C-terminus                                                                                                                                        | transposase                                      | 106/110 (97%)   | 1e-58   | <i>L. lactis</i> subsp. <i>cremoris</i> SK11, pSK11P |
| orf7      | 7860       | 8213     | +      | 117         | 36.75   | Transposase and inactivated derivatives, Tra5 (COG2963); Helix-turn-helix domain of Hin and related proteins (cl01116); truncated, C-terminus                                                                         | IS-LL6 transposase/hypothetical protein fusion   | 115/115 (100%)  | 8e-60   | <i>L. lactis</i> subsp. <i>cremoris</i> SK11, pSK11P |
| tnp-IS3   | 8171       | 9070     | +      | 299         | 38.46   | Transposase belonging to the IS3 family; putative transposase OrfB (PHA02517)                                                                                                                                         | unnamed protein product                          | 298/299 (99%)   | 5e-177  | <i>Lactococcus lactis</i>                            |
| orf9      | 9329       | 11191    | +      | 620         | 40.91   | Cation transport ATPase (COG2217); Haloacid Dehalogenase superfamily (TIGR01488); E1-E2 ATPase (pfam00122)                                                                                                            | cation transport ATPase                          | 617/620 (99%)   | 0.0     | <i>L. lactis</i> subsp. <i>lactis</i> KF147, pKF147A |
| orf10     | 11894      | 12121    | +      | 75          | 37.77   | Heavy-metal-associated domain (pfam00403); Copper chaperone [Inorganic ion transport and metabolism] (COG2608)                                                                                                        | copper chaperone                                 | 75/75 (100%)    | 3e-34   | <i>L. lactis</i> subsp. <i>lactis</i> KF147, pKF147A |
| dpsB      | 12170      | 12715    | +      | 181         | 35.91   | DPS protein, ferritin-like diiron-binding domain (cd01043)                                                                                                                                                            | DNA binding protein                              | 181/181 (100%)  | 9e-101  | <i>L. lactis</i> subsp. <i>lactis</i> KF147, pKF147A |
| flp       | 12801      | 13490    | +      | 229         | 38.71   | cAMP-binding proteins (COG0664); effector domain of the CAP family of transcription factors (cd00038); Winged helix-turn-helix (WHTH) DNA-binding domain of the GntR family of transcriptional regulators (cl00088)   | FNR family transcriptional regulator             | 225/229 (99%),  | 5e-129  | <i>L. lactis</i> subsp. <i>lactis</i> KF147, pKF147A |
| oppD      | 14464      | 15480    | +      | 338         | 37.77   | ABC-type dipeptide/oligopeptide/nickel transport system, ATPase component, DppD (COG0444); ABC_NikE_OppD_transporters (cd03257)                                                                                       | oligopeptide ABC transporter ATP binding protein | 333/338 (99%)   | 0.0     | <i>L. lactis</i> subsp. <i>lactis</i> IL1403         |
| oppF      | 15477      | 16436    | +      | 319         | 35.63   | ABC-type dipeptide/oligopeptide/nickel transport system, ATPase component, DppF (COG0444); ABC_NikE_OppD_transporters (cd03257)                                                                                       | oligopeptide transporter F                       | 316/319 (99%)   | 0.0     | <i>Lactococcus lactis</i> , pGdh442                  |
| oppB      | 16417      | 17376    | +      | 319         | 38.14   | ABC-type dipeptide/oligopeptide/nickel transport systems, permease components (COG0601); Transmembrane subunit found in Periplasmic Binding Protein (PBP)-dependent ATP-Binding Cassette (ABC) transporters (cd06261) | oligopeptide transporter B                       | 316/319 (99%)   | 0.0     | <i>Lactococcus lactis</i> , pGdh442                  |
| oppC      | 17386      | 18270    | +      | 294         | 36.39   | ABC-type uncharacterized transport system, permease component (COG4239); Transmembrane subunit found in Periplasmic Binding Protein (PBP)-dependent ATP-Binding Cassette (ABC) transporters (cd06261)                 | oligopeptide transporter C                       | 289/294 (99%)   | 1e-164  | <i>Lactococcus lactis</i> , pGdh442                  |
| oppA      | 18375      | 20177    | +      | 600         | 37.37   | PBP2_Lactococcal_OppA_like transport system, substrate binding domain (cd08510)                                                                                                                                       | oligopeptide transporter A                       | 576/599 (97%)   | 0.0     | <i>Lactococcus lactis</i> , pGdh442                  |
| pepO      | 20302      | 22185    | +      | 627         | 35.17   | Predicted metalloendopeptidase PepO (COG3590); Peptidase family M13 (pfam01431)                                                                                                                                       | oligoendopeptidase O                             | 623/626 (99%)   | 0.0     | <i>L. lactis</i> subsp. <i>lactis</i> KF147, pKF147A |
| tnp-IS946 | 23487      | 22849    | -      | 212         | 39.93   | rve, Integrase core domain (pfam00665); Transposase and inactivated derivatives (COG3316)                                                                                                                             | transposase                                      | 201/213 (95%)   | 3e-113  | <i>Lactococcus lactis</i> , pTR2030                  |
| nah       | 24387      | 25532    | +      | 381         | 30.44   | Sodium/hydrogen exchanger family (pfam00999); Kef-type K <sup>+</sup> transport systems, membrane components (COG0475)                                                                                                | Na <sup>+</sup> /H <sup>+</sup> antiporter       | 374/374 (100%)  | 0.0     | <i>Lactococcus lactis</i> , pGdh442                  |
| orf21     | 25545      | 26882    | +      | 445         | 34.23   | potassium uptake protein, TrkH family (TIGR00933); Trk-type K <sup>+</sup> transport systems, membrane components, TrkG (COG0168)                                                                                     | putative K <sup>+</sup> transporter              | 443/445 (99%)   | 0.0     | <i>Lactococcus lactis</i> , pGdh442                  |

| Gene name  | Start (bp) | End (bp) | Strand | Length (aa) | G+C (%) | Product / Predicted function / Conserved domain(s)                                                                                                  | Highest homology protein                                                      | aa identity (%) | E-value | Organism, plasmid                                    |
|------------|------------|----------|--------|-------------|---------|-----------------------------------------------------------------------------------------------------------------------------------------------------|-------------------------------------------------------------------------------|-----------------|---------|------------------------------------------------------|
| orf22      | 26902      | 27573    | +      | 223         | 32.88   | K+ transport systems, NAD-binding component, TrkA (COG0569); Anion permease ArsB/NhaD (cl09110); Rossmann-fold NAD(P)(+)-binding proteins (cl09931) | putative K+ transport system TrkA                                             | 213/214 (99%)   | 5e-118  | <i>Lactococcus lactis</i> , pGdh442                  |
| orf23      | 28408      | 27952    | -      | 152         | 39.6    | transposase IS1216E belonging to IS6 family; truncated, C-terminus                                                                                  | transposase                                                                   | 151/152 (99%)   | 8e-84   | <i>L. lactis</i> subsp. <i>lactis</i> K214, pK214    |
| orf24      | 29250      | 28969    | -      | 93          | 33.69   | hypothetical protein                                                                                                                                | hypothetical protein pGdh442_p07                                              | 92/93 (99%)     | 2e-47   | <i>Lactococcus lactis</i> , pGdh442                  |
| orf25      | 29314      | 29685    | +      | 124         | 33.81   | Protein family of unknown function, DUF322 (PFAM03780); may be involved in stress response; truncated, C-terminus                                   | General stress protein, Gls24 family                                          | 123/125 (99%)   | 3e-60   | <i>L. lactis</i> subsp. <i>lactis</i> KF147, pKF147A |
| cspA       | 30661      | 30861    | +      | 66          | 33.33   | putative cold shock protein                                                                                                                         | cold shock protein                                                            | 66/66 (100%)    | 3e-29   | <i>L. lactis</i> subsp. <i>lactis</i> CV56           |
| cspC       | 30992      | 31192    | +      | 66          | 32.82   | Cold-shock' DNA-binding domain (pfam00313); Ribosomal protein S1-like RNA-binding domain (cl09927)                                                  | cold shock protein                                                            | 64/66 (97%)     | 1e-29   | <i>L. lactis</i> subsp. <i>lactis</i> KF147          |
| cspB       | 31397      | 31672    | +      | 91          | 32.6    | Cold-shock' DNA-binding domain (pfam00313); Ribosomal protein S1-like RNA-binding domain (cl09927)                                                  | cold shock protein                                                            | 90/91 (99%)     | 9e-46   | <i>L. lactis</i> subsp. <i>lactis</i> KF147          |
| orf29      | 32168      | 32761    | +      | 197         | 31.47   | Helix-turn-helix XRE-family like proteins (cd00093)                                                                                                 | XRE family transcriptional regulator                                          | 169/179 (95%)   | 1e-85   | <i>L. lactis</i> subsp. <i>lactis</i> KF147, pKF147A |
| mobC       | 33951      | 34397    | +      | 148         | 26.8    | Bacterial mobilisation protein, MobC (pfam05713)                                                                                                    | ORF57                                                                         | 104/122 (86%)   | 4e-52   | <i>Lactococcus lactis</i> , pNP40                    |
| mobD       | 34324      | 34836    | +      | 170         | 32.15   | Relaxase/Mobilisation nuclease domain (pfam03432)                                                                                                   | relaxase                                                                      | 160/168 (95%)   | 5e-92   | <i>L. lactis</i> subsp. <i>lactis</i> CV56           |
| tnp-ISLp1  | 35165      | 34743    | +      | 140         | 36.19   | Transposase and inactivated derivatives, IS30 family (COG2826)                                                                                      | putative transposase of ISLp1                                                 | 139/140 (99%)   | 1e-75   | <i>Lactococcus lactis</i> , pGdh442                  |
| dld        | 35423      | 37102    | +      | 559         | 38.87   | D-lactate dehydrogenase, membrane binding (pfam09330); FAD/FMN-containing dehydrogenases (COG0277)                                                  | D-lactate dehydrogenase                                                       | 558/559 (99%)   | 0.0     | <i>Enterococcus faecalis</i> TX1322                  |
| tnp1-IS150 | 37206      | 37757    | +      | 183         | 36.24   | Transposase and inactivated derivatives, IS3 family (COG2963)                                                                                       | transposase                                                                   | 182/183 (99%)   | 6e-103  | <i>L. lactis</i> subsp. <i>cremoris</i> SK11         |
| tnp2-IS150 | 37760      | 38581    | +      | 273         | 34.67   | Integrase core domain (pfam00665); Transposase and inactivated derivatives, IS3 family (COG2801)                                                    | transposase                                                                   | 269/273 (99%)   | 2e-158  | <i>Enterococcus faecalis</i> T1                      |
| orf36      | 38592      | 38942    | +      | 117         | 36.75   | Transposase and inactivated derivatives, IS3 family (COG2963); Helix-turn-helix DNA-binding domain of Hin and related proteins (cl01116)            | IS-LL6 transposase/hypothetical protein fusion                                | 115/115 (100%)  | 8e-60   | <i>L. lactis</i> subsp. <i>cremoris</i> SK11, pSK11P |
| orf37      | 38915      | 39799    | +      | 295         | 38.75   | Transposase and inactivated derivatives, IS3 family (COG2963); Helix-turn-helix DNA-binding domain of Hin and related proteins (cl01116)            | unnamed protein product                                                       | 294/295 (99%)   | 8e-175  | <i>Lactococcus lactis</i> , pGdh442                  |
| orf38      | 39944      | 40387    | -      | 148         | 36.93   | Integrase core domain (pfam00665); Transposase and inactivated derivatives, IS3 family (COG2801); truncated                                         | IS981 transposase B                                                           | 92/136 (68%)    | 3e-42   | <i>L. lactis</i> subsp. <i>lactis</i> KF147          |
| pepF       | 40372      | 42177    | -      | 601         | 33.94   | Oligoendopeptidase F (COG1164); Peptidase family M3B Oligopeptidase F (cd06459)                                                                     | oligopeptidase F                                                              | 597/602 (99%)   | 0.0     | <i>L. lactis</i> subsp. <i>cremoris</i> SK11, pSK11P |
| tnp-IS1297 | 43658      | 44335    | +      | 225         | 34.36   | transposase, IS1297 family                                                                                                                          | integrase core domain protein                                                 | 166/226 (73%)   | 1e-110  | <i>Enterococcus faecalis</i> TX1302                  |
| lacX       | 44397      | 45296    | -      | 299         | 37.44   | Aldose 1-epimerase, similar to <i>Lactococcus lactis</i> lacX (cd09024); Galactose mutarotase and related enzymes (COG2017); truncated, N-terminus  | galactose mutarotase-like protein                                             | 257/299 (86%)   | 0.0     | <i>L. lactis</i> , pLP712                            |
| lacG       | 45588      | 47021    | -      | 477         | 38.15   | Glycosyl hydrolase family (pfam00232); 6-phospho-beta-galactosidase (TIGR01233)                                                                     | 6-phospho-beta-galactosidase                                                  | 475/477 (99%)   | 0.0     | <i>Lactobacillus sakei</i>                           |
| lacE       | 47132      | 48838    | -      | 568         | 41      | phosphotransferase system, lactose specific, IIC component (TIGR00394); PTS_IIB_lactose (cd05565)                                                   | PTS family lactose porter IICB component                                      | 557/568 (98%)   | 0.0     | <i>Enterococcus casseliflavus</i> ATCC 12755         |
| lacF       | 48838      | 49155    | -      | 105         | 42.53   | PTS_IIA, PTS system, lactose/cellobiose specific IIA subunit (cd00215)                                                                              | PTS family lactose-N,N-diacetylchitobiose-beta-glucoside porter component IIA | 105/105 (100%)  | 3e-54   | <i>Enterococcus faecium</i> TX1330                   |

| Gene name | Start (bp) | End (bp) | Strand | Length (aa) | G+C (%) | Product / Predicted function / Conserved domain(s)                                                                                                                                   | Highest homology protein                      | aa identity (%) | E-value | Organism, plasmid                  |
|-----------|------------|----------|--------|-------------|---------|--------------------------------------------------------------------------------------------------------------------------------------------------------------------------------------|-----------------------------------------------|-----------------|---------|------------------------------------|
| lacD      | 49183      | 50163    | -      | 326         | 39.05   | Tagatose 1,6-diphosphate aldolase (TIGR01232)                                                                                                                                        | tagatose 1,6-diphosphate aldolase             | 322/326 (99%)   | 0.0     | <i>Enterococcus faecium</i> TX1330 |
| lacC      | 50167      | 51099    | -      | 310         | 36.66   | 1-phosphofructokinase (FruK), minor 6-phosphofructokinase (pfkB) and related sugar kinases (cd01164); tagatose-6-phosphate kinase, lacC (TIGR01231)                                  | tagatose-6-phosphate kinase                   | 307/310 (99%)   | 2e-176  | <i>Enterococcus faecium</i> TX1330 |
| lacB      | 51110      | 51625    | -      | 171         | 39.76   | Galactose-6-phosphate isomerase subunit LacB (TIGR01119)                                                                                                                             | galactose-6-phosphate isomerase, subunit LacB | 170/171 (99%)   | 2e-95   | <i>Lactobacillus sakei</i>         |
| lacA      | 51642      | 52067    | -      | 141         | 39.0    | Galactose-6-phosphate isomerase subunit LacA (TIGR01118)                                                                                                                             | galactose-6-phosphate isomerase, subunit LacA | 140/141 (99%)   | 1e-74   | <i>Lactococcus lactis</i> , pLP712 |
| lacR      | 52567      | 53334    | -      | 255         | 34.63   | Winged helix-turn-helix DNA-binding domain of the GntR family of transcriptional regulators (cd07377); Bacterial regulatory proteins, deoR family (pfam00455); truncated, N-terminus | lactose phosphotransferase system repressor   | 238/254 (94%)   | 2e-160  | <i>L. lactis</i> , pLP712          |

TABLE S2. List of ORFs identified in pVF22 (size 22,166 bp; GC content 35.14%)

| Gene name   | Start (bp) | End (bp) | Strand | Length (aa) | G+C (%) | Product / Predicted function / Conserved domain(s)                                              | Highest homology protein                             | aa identity (%) | E-value | Organism, plasmid                                               |
|-------------|------------|----------|--------|-------------|---------|-------------------------------------------------------------------------------------------------|------------------------------------------------------|-----------------|---------|-----------------------------------------------------------------|
| repB        | 241        | 1566     | +      | 441         | 36.58   | hypothetical protein                                                                            | replication protein B                                | 344/383 (90%)   | 0.0     | <i>L. lactis</i> subsp. <i>lactis</i> CV56                      |
| orfX        | 1559       | 2596     | +      | 345         | 39.9    | replication-associated protein, similar to OrfX                                                 | hypothetical protein pDB0R0p06                       | 191/202 (94%)   | 8e-103  | <i>L. lactis</i> subsp. <i>lactis</i> bv. <i>diacetyllactis</i> |
| hsdR        | 2607       | 3254     | +      | 215         | 36.43   | type I restriction-modification system restriction subunit, N-terminus; hsdS domain, C-terminus | restriction subunit                                  | 135/181 (74%)   | 7e-66   | <i>L. lactis</i> subsp. <i>lactis</i> bv. <i>diacetyllactis</i> |
| corA1       | 3440       | 4390     | +      | 316         | 31.96   | Mg <sup>2+</sup> and Co <sup>2+</sup> transport protein, CorA superfamily                       | CorA like magnesium and cobalt transport protein     | 316/316 (100%)  | 0.0     | <i>L. lactis</i> subsp. <i>cremoris</i> MG1363                  |
| orf5        | 4772       | 5032     | +      | 86          | 33.33   | hypothetical protein; similar to repA                                                           | hypothetical protein pAH33_04                        | 85/86 (98%)     | 2e-42   | <i>L. lactis</i>                                                |
| corA2       | 5126       | 6034     | +      | 302         | 43.15   | Mg <sup>2+</sup> and Co <sup>2+</sup> transport protein, CorA superfamily                       | hypothetical protein pNZ4000_44                      | 300/302 (99%)   | 4e-174  | <i>L. lactis</i> subsp. <i>cremoris</i>                         |
| orf7        | 7044       | 9158     | +      | 704         | 40.29   | ATP-dependent Clp protease, ATP-binding subunit ClpL                                            | ATP-dependent Clp protease, ATP-binding subunit ClpL | 698/704 (99%)   | 0.0     | <i>Enterococcus casseliflavus</i> ATCC 12755                    |
| orf8        | 9346       | 9822     | +      | 158         | 40.04   | truncated transposase                                                                           | integrase core domain protein                        | 148/158 (94%)   | 5e-82   | <i>Enterococcus faecalis</i> TX4244                             |
| orf9        | 9917       | 10492    | +      | 191         | 35.07   | putative glycopeptide antibiotics resistance protein                                            | hypothetical protein                                 | 189/191 (98%)   | 1e-101  | <i>Streptococcus salivarius</i>                                 |
| pinR        | 10866      | 11420    | +      | 184         | 34.78   | Site-specific Serine Recombinase                                                                | resolvase                                            | 182/184 (99%)   | 2e-103  | <i>L. lactis</i> subsp. <i>lactis</i> KF147                     |
| orf11       | 12130      | 11594    | -      | 178         | 32.95   | putative acetyltransferase, GNAT family                                                         | Acetyltransferase                                    | 87/177 (49%)    | 2e-40   | <i>Streptococcus suis</i> 05ZYH33                               |
| tnp1-IS1216 | 12937      | 12293    | -      | 214         | 38      | transposase, IS1216 family                                                                      | IS1216 transposase                                   | 212/214 (99%)   | 1e-120  | <i>Enterococcus faecalis</i> V583                               |
| orf13       | 12971      | 13216    | +      | 81          | 27.98   | hypothetical protein                                                                            | hypothetical protein pLK0018_p17                     | 80/81 (99%)     | 9e-38   | <i>Lactococcus garvieae</i> , pLK0018                           |
| orf14       | 14046      | 15986    | +      | 646         | 33.38   | tetracycline resistance protein                                                                 | tetracycline resistance protein                      | 646/646 (100%)  | 0.0     | <i>Lactococcus garvieae</i> , pLK0018                           |
| orf15       | 16074      | 16241    | +      | 55          | 35.75   | hypothetical protein                                                                            | hypothetical protein pK214_p31                       | 54/55 (98%)     | 2e-23   | <i>L. lactis</i> subsp. <i>lactis</i> , pK214                   |
| tnp2-IS1216 | 17252      | 16566    | -      | 228         | 37.71   | transposase, IS1216 family                                                                      | IS1216 transposase                                   | 228/228 (100%)  | 5e-131  | <i>Enterococcus faecalis</i> , pEF-01                           |
| orf17       | 18401      | 18658    | +      | 85          | 38.43   | DNA recombinase, C-terminal fragment                                                            | DNA recombinase                                      | 82/85 (96%)     | 8e-42   | <i>L. lactis</i> subsp. <i>lactis</i>                           |
| orf18       | 18787      | 19110    | +      | 107         | 34.26   | conserved hypothetical protein                                                                  | cytochrome B                                         | 104/107 (97%)   | 1e-47   | <i>L. lactis</i> subsp. <i>lactis</i> CV56                      |
| mobC1       | 19082      | 19576    | +      | 164         | 34.34   | MobC-like mobilization protein                                                                  | conserved hypothetical protein                       | 163/164 (98%)   | 3e-88   | <i>Enterococcus faecalis</i> TX2141                             |
| mobA        | 19555      | 20787    | +      | 410         | 40.4    | MobA-like mobilization protein                                                                  | Relaxase/Mobilisation nuclease domain                | 406/410 (99%)   | 0.0     | <i>Enterococcus</i> sp. 7L76                                    |
| mobB        | 20784      | 21407    | +      | 207         | 37.35   | MobB-like mobilization protein                                                                  | putative mobilization protein                        | 184/207 (88%)   | 3e-104  | <i>L. lactis</i> subsp. <i>cremoris</i>                         |
| mobC2       | 21424      | 22026    | +      | 200         | 32      | MobC-like mobilization protein                                                                  | putative mobilization protein                        | 198/200 (99%)   | 5e-111  | <i>L. lactis</i> subsp. <i>cremoris</i>                         |

**TABLE S3. List of ORFs identified in pVF21 (size 21,728 bp; GC content 33.59%)**

| Gene name   | Start (bp) | End (bp) | Strand | Length (aa) | G+C (%) | Product / Predicted function / Conserved domain(s)                              | Highest homology protein                        | aa identity (%) | E-value | Organism, plasmid                                              |
|-------------|------------|----------|--------|-------------|---------|---------------------------------------------------------------------------------|-------------------------------------------------|-----------------|---------|----------------------------------------------------------------|
| orf1        | 1506       | 1        | -      | 501         | 28.03   | Primosomal protein N' (replication factor Y), superfamily II helicase (COG1198) | hypothetical protein HMPREF9397_2038            | 214/510 (42%)   | 6e-92   | <i>Streptococcus sanguinis</i> SK1087                          |
| tnp1A-IS981 | 2179       | 1679     | -      | 166         | 35.14   | transposase, IS981 family; C-terminus, frame shift                              | transposase                                     | 148/163 (90%)   | 3e-85   | <i>L. lactis</i> subsp. <i>cremoris</i> SK11                   |
| tnp1B-IS981 | 2502       | 2161     | -      | 119         | 40.33   | transposase, IS981 family; N-terminus, frame shift                              | transposase                                     | 100/117 (85%)   | 2e-53   | <i>L. lactis</i> subsp. <i>cremoris</i> SK11                   |
| tnp2-IS981  | 2774       | 2514     | -      | 86          | 37.98   | transposase of IS981, IS3 family                                                | transposase                                     | 85/86 (99%)     | 8e-42   | <i>L. lactis</i> subsp. <i>lactis</i> KF147                    |
| orf5        | 4964       | 3867     | -      | 365         | 26.48   | hypothetical protein containing the DGQHR domain (TIGR03187)                    | hypothetical protein HMPREF9382_0017            | 140/362 (39%)   | 5e-46   | <i>Streptococcus sanguinis</i> SK115                           |
| repB        | 6967       | 8118     | +      | 383         | 33.5    | replication protein RepB                                                        | replication protein                             | 378/383 (98%)   | 0.0     | <i>L. lactis</i> subsp. <i>cremoris</i> , pNZ4000              |
| orfX        | 8118       | 8747     | +      | 209         | 33.33   | replication-associated protein, similar to OrfX                                 | hypothetical protein LACR_E7                    | 126/222 (56%)   | 1e-50   | <i>L. lactis</i> subsp. <i>cremoris</i> SK11                   |
| hsdR        | 8758       | 11835    | +      | 1025        | 37.91   | type I restriction-modification system, restriction subunit                     | hypothetical protein pAH82_p15                  | 1017/1025 (99%) | 0.0     | <i>L. lactis</i> subsp. <i>lactis</i>                          |
| hsdM        | 11817      | 13430    | +      | 537         | 39.78   | type I restriction-modification system, modification subunit                    | putative type I site-specific deoxyribonuclease | 534/537 (99%)   | 0.0     | <i>L. lactis</i> subsp. <i>cremoris</i> MG1363                 |
| hsdS        | 13420      | 14644    | +      | 414         | 36.47   | type I restriction-modification system, specificity subunit                     | type I R/M system specificity subunit           | 159/430 (36%)   | 3e-58   | <i>L. lactis</i> subsp. <i>lactis</i> bv. <i>diacetylactis</i> |
| gdh         | 15048      | 16394    | +      | 448         | 44.27   | NADP-dependent glutamate dehydrogenase                                          | glutamate dehydrogenase                         | 447/448 (99%)   | 0.0     | <i>Lactococcus lactis</i> , pGdh442                            |
| tnp-IS1216  | 17201      | 16515    | -      | 228         | 39.32   | transposase for insertion sequence-like element IS1216                          | hypothetical protein pGdh442_02                 | 227/228 (99%)   | 7e-131  | <i>Lactococcus lactis</i> , pGdh442                            |
| cadA        | 19475      | 17358    | -      | 705         | 37.16   | cadmium efflux ATPase CadA                                                      | cadmium efflux ATPase CadA                      | 705/705 (100%)  | 0.0     | <i>L. lactis</i> subsp. <i>lactis</i>                          |
| cadC        | 19472      | 19831    | -      | 119         | 31.37   | cadmium resistance regulator CadC                                               | cadmium resistance regulator CadC               | 119/119 (100%)  | 1e-61   | <i>L. lactis</i> subsp. <i>lactis</i>                          |
| orf15       | 20550      | 20227    | -      | 107         | 20.87   | putative cation efflux system protein                                           | hypothetical protein LLKF_p0013                 | 106/107 (99%)   | 8e-53   | <i>L. lactis</i> subsp. <i>lactis</i> KF147, pKF147A           |
| entA-imm    | 21163      | 20825    | -      | 111         | 33.33   | enterocin A Immunity domain (pfam08951)                                         | ORF13                                           | 96/107 (90%)    | 9e-45   | <i>Lactococcus lactis</i> , pNP40                              |

**Table S4. List of ORFs identified in pVF18 (size 18,977 bp; GC content 33.9%)**

| Gene name   | Start (bp) | End (bp) | Strand | Length (aa) | G+C (%) | Product / Predicted function / Conserved domain(s)                                                   | Highest homology protein                                      | aa identity (%) | E-value | Organism, plasmid                              |
|-------------|------------|----------|--------|-------------|---------|------------------------------------------------------------------------------------------------------|---------------------------------------------------------------|-----------------|---------|------------------------------------------------|
| orf1        | 834        | 7        | -      | 275         | 30.30   | putative membrane protein                                                                            | hypothetical protein limg_0710                                | 271/275 (99%)   | 1e-151  | <i>L. lactis</i> subsp. <i>cremoris</i> MG1363 |
| orf2        | 1175       | 831      | -      | 114         | 31.87   | transcriptional regulator, PadR-like family                                                          | hypothetical protein pMRC01_047                               | 114/114 (100%)  | 2e-58   | <i>Lactococcus lactis</i> , pMRC01             |
| tnp1-1216   | 1355       | 2005     | +      | 216         | 37.25   | transposase, IS1216 family                                                                           | integrase core domain protein                                 | 201/202 (99%)   | 2e-112  | <i>Streptococcus parauberis</i> NCFD2020       |
| orf4        | 2230       | 2469     | +      | 79          | 40.75   | integral membrane protein; putative transglycosylase associated proteins, cl00978                    | hypothetical protein limg_1257                                | 78/79 (98%)     | 6e-26   | <i>L. lactis</i> subsp. <i>cremoris</i> MG1363 |
| orf5        | 2499       | 3059     | +      | 186         | 32.61   | putative membrane protein                                                                            | hypothetical protein LLKF_2283                                | 181/186 (98%)   | 6e-87   | <i>L. lactis</i> subsp. <i>lactis</i> KF147    |
| orf6        | 3069       | 3257     | +      | 62          | 30.64   | small integral membrane protein of unknown function, COG5547                                         | hypothetical protein limg_1259                                | 62/62 (100%)    | 2e-07   | <i>L. lactis</i> subsp. <i>cremoris</i> MG1363 |
| orf7        | 3278       | 3829     | +      | 183         | 35.15   | general stress protein, Gls24 family                                                                 | putative 20-kDa protein                                       | 183/183 (100%)  | 6e-80   | <i>Lactococcus lactis</i>                      |
| orf8        | 4087       | 4548     | +      | 153         | 28.32   | putative acetyltransferase, GNAT family, cd04301                                                     | hypothetical protein pJB01p2                                  | 149/153 (97%)   | 2e-81   | <i>Enterococcus faecium</i>                    |
| orf9        | 4884       | 5120     | +      | 74          | 33.33   | putative DNA polymerase III subunit epsilon, PRK06195; truncated, N-terminus                         | conserved hypothetical protein                                | 73/74 (99%)     | 1e-34   | <i>Enterococcus faecalis</i> E1Sol             |
| tnp2-IS1216 | 7119       | 6439     | -      | 226         | 36.57   | transposase, IS1216 family                                                                           | ORF-W2 protein                                                | 221/226 (97%)   | 2e-121  | <i>Lactococcus lactis</i>                      |
| orf11       | 7288       | 8586     | +      | 432         | 36.11   | putative hydrolase; polysaccharide deacetylase domain, PFAM01522                                     | conserved hypothetical protein                                | 431/432 (99%)   | 0.0     | <i>Enterococcus faecium</i> PC4.1              |
| orf12       | 8743       | 8934     | +      | 63          | 37.56   | DNA integrase/recombinase, C-terminal fragment                                                       | DNA recombinase                                               | 61/63 (96%)     | 1e-28   | <i>L. lactis</i> subsp. <i>lactis</i>          |
| orf13       | 9066       | 9383     | +      | 105         | 34.06   | conserved hypothetical protein; putative cytochrome B-like                                           | unknown                                                       | 85/91 (94%)     | 4e-42   | <i>L. lactis</i> subsp. <i>cremoris</i>        |
| repB        | 10408      | 11565    | +      | 385         | 33.93   | replication protein RepB                                                                             | replication protein                                           | 305/385 (79%)   | 2e-178  | <i>L. lactis</i> subsp. <i>lactis</i>          |
| orf15       | 11579      | 12106    | +      | 175         | 27.04   | hypothetical protein                                                                                 | hypothetical protein LACR_B7                                  | 165/175 (94%)   | 1e-84   | <i>L. lactis</i> subsp. <i>cremoris</i> SK11   |
| orfX        | 12103      | 12735    | +      | 210         | 31.90   | replication-associated protein, similar to OrfX                                                      | hypothetical protein pCI305_p2                                | 186/210 (88%)   | 3e-99   | <i>L. lactis</i> subsp. <i>lactis</i> , pCI305 |
| hsdS        | 12711      | 13979    | +      | 422         | 34.91   | type I restriction-modification system, specificity subunit                                          | type I R/M system specificity subunit                         | 172/415 (41%)   | 4e-70   | <i>L. lactis</i> subsp. <i>lactis</i> CV56     |
| orf18       | 14113      | 14649    | +      | 178         | 30.95   | transcriptional regulator, Xre family                                                                | putative transcriptional regulator                            | 53/130 (41%)    | 1e-24   | <i>Leuconostoc kimchii</i> IMSNU11154          |
| orf19       | 14793      | 15020    | +      | 75          | 40.44   | hypothetical protein                                                                                 | hypothetical protein LKI_10701                                | 72/79 (92%)     | 6e-32   | <i>Leuconostoc kimchii</i> IMSNU11154          |
| orf20       | 15017      | 15667    | +      | 216         | 44.13   | ABC_cobalt_CbiO domain; cl09099: P-loop NTPase                                                       | ABC transporter, ATP-binding protein                          | 215/216 (99%)   | 4e-123  | <i>Leuconostoc kimchii</i> IMSNU11154          |
| orf21       | 15664      | 16419    | +      | 251         | 46.08   | ABC-type uncharacterized transport system, permease component, COG0390; putative YbbM family protein | ABC-type uncharacterized transport system, permease component | 251/251 (99%)   | 9e-139  | <i>Leuconostoc citreum</i> KM20                |
| orf22       | 16597      | 16902    | +      | 102         | 40.84   | DNA integrase/recombinase, N-terminal fragment                                                       | integrase/recombinase plasmid associated, putative            | 101/102 (99%)   | 2e-51   | <i>Leuconostoc kimchii</i> IMSNU11154          |
| orf23       | 16961      | 17371    | +      | 136         | 29.13   | putative acetyltransferase, GNAT family, cd04301                                                     | GNAT family acetyltransferase                                 | 134/136 (99%)   | 6e-70   | <i>L. lactis</i> subsp. <i>lactis</i> CV56     |
| tnp-IS6770  | 17986      | 17597    | -      | 130         | 35.64   | transposase, IS30 family, COG2826; N-terminal fragment                                               | transposase                                                   | 130/130 (100%)  | 6e-71   | <i>Enterococcus faecalis</i> TUSoD Ef11        |
| orf25       | 18201      | 18623    | +      | 140         | 35.95   | protein containing cupin 2 domain, PFAM07883                                                         | hypothetical protein LargK3_07881                             | 140/140 (100%)  | 2e-76   | <i>Streptococcus parauberis</i> KCTC11537      |
